# Supplementary material for: Should we support prophylactic intervention for asymptomatic kidney stones? A retrospective cohort study with long-term follow-up
Source: Springer Nature journal article supplement (doi:10.1007/s00240-022-01331-4), 2022-05-27
Supplement: MOESM1 [file 23088000]

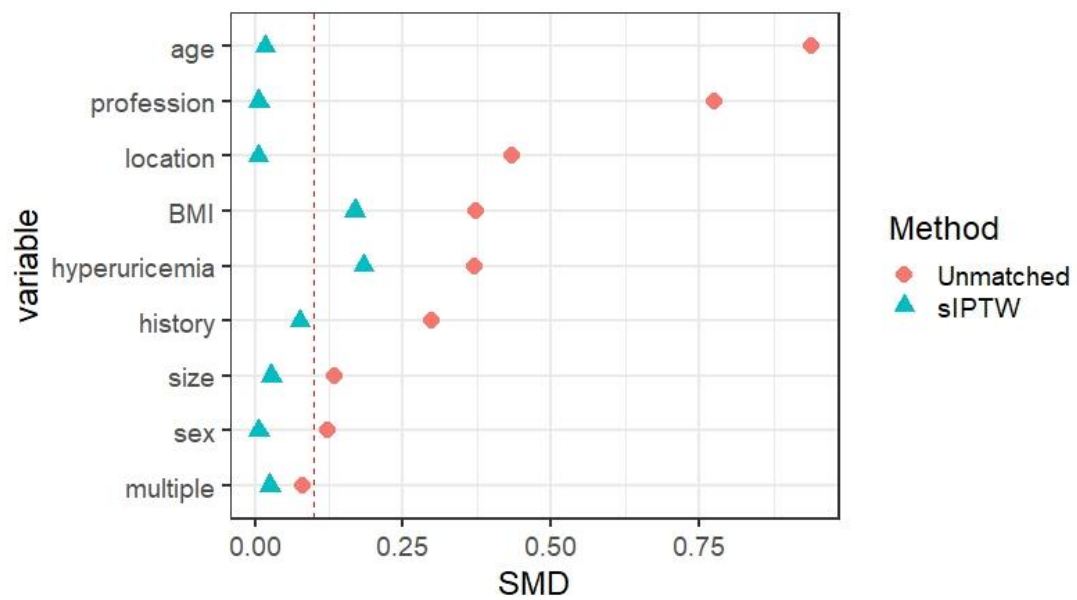

**Fig. S1** Balanced diagnostic plot of baseline factors before and after stabilized IPTW

**Table S1 Details of Exposure Group**

|                                                           | <b>Stone-free<br/>N=24</b> | <b>Residual fragments<br/>N=17</b> |
|-----------------------------------------------------------|----------------------------|------------------------------------|
| <b>Prophylactic intervention</b>                          |                            |                                    |
| ESWL <sup>a</sup>                                         | 4(17%)                     | 2(12%)                             |
| RIRS <sup>a</sup>                                         | 19(79%)                    | 12(71%)                            |
| PCNL <sup>a</sup>                                         | 1(4%)                      | 3(18%)                             |
| <b>Twice or more<sup>a</sup></b>                          | 2(8%)                      | 6(35%)                             |
| <b>Two kinds of intervention<sup>a</sup></b>              | 1(4%)                      | 3(18%)                             |
| <b>Time to intervention,<sup>b</sup> days</b>             | 16(9-68)                   | 19(8-130)                          |
| <b>Mean stone size,<sup>c</sup> mm</b>                    |                            |                                    |
| Before intervention                                       | 5.0±2.6                    | 6.2±3.7                            |
| After intervention                                        | 0                          | 4.0±2.0                            |
| Maximum diameter reduction                                | 5.2±2.6                    | 2.2±3.4                            |
| <b>Complications<sup>a</sup></b>                          |                            |                                    |
| Overall                                                   | 20(83%)                    | 16(94%)                            |
| Clavien I                                                 | 3(13%)                     | 4(24%)                             |
| Clavien II                                                | 17(71%)                    | 12(71%)                            |
| ≥Clavien III                                              | 0                          | 0                                  |
| <b>Stone-related events after treatment<sup>a</sup></b>   | 1(4%)                      | 4(24%)                             |
| <b>Time to events after treatment,<sup>b</sup> months</b> | 36                         | 29(15-43)                          |
| <b>Future intervention<sup>a</sup></b>                    | 0(0%)                      | 2(12%)                             |

a. Data presented as frequency (%)

b. Data presented as median (interquartile range)

c. Data presented as mean ± standard deviation

**Table S2 Demographics and Baseline Disease Characteristics, Before and After  
Stabilized Inverse Probability of Treatment Weighting**

| Variables          |        | Before                   |                           |                | After                      |                             |                |
|--------------------|--------|--------------------------|---------------------------|----------------|----------------------------|-----------------------------|----------------|
|                    |        | Control<br>group<br>N=79 | Exposure<br>group<br>N=41 | <i>p</i> value | Control<br>group<br>N=78.2 | Exposure<br>group<br>N=40.6 | <i>p</i> value |
| Sex (%)            | Female | 13 (16.5)                | 5 (12.2)                  | 0.726          | 11.9 (15.2)                | 6.3 (15.5)                  | 0.977          |
|                    | Male   | 66 (83.5)                | 36 (87.8)                 |                | 66.3 (84.8)                | 34.3 (84.5)                 |                |
| Profession (%)     | Other  | 43 (54.4)                | 8 (19.5)                  | 0.001*         | 33.9 (43.4)                | 17.5 (43.1)                 | 0.982          |
|                    | Pilot  | 36 (45.6)                | 33 (80.5)                 |                | 44.2 (56.6)                | 23.1 (56.9)                 |                |
| Multiple stone (%) | No     | 47 (59.5)                | 26 (63.4)                 | 0.826          | 48.3 (61.8)                | 25.6 (63.0)                 | 0.922          |
|                    | Yes    | 32 (40.5)                | 15 (36.6)                 |                | 29.9 (38.2)                | 15.0 (37.0)                 |                |
| Location (%)       | Lower  | 11 (13.9)                | 13 (31.7)                 | 0.039*         | 16.0 (20.5)                | 8.2 (20.3)                  | 0.979          |
|                    | Not    | 68 (86.1)                | 28 (68.3)                 |                | 62.1 (79.5)                | 32.4 (79.7)                 |                |
| Size (%)           | <5 mm  | 40 (50.6)                | 18 (43.9)                 | 0.612          | 40.1 (51.2)                | 20.2 (49.8)                 | 0.917          |
|                    | ≥5 mm  | 39 (49.4)                | 23 (56.1)                 |                | 38.1 (48.8)                | 20.4 (50.2)                 |                |
| Stone history (%)  | No     | 58 (73.4)                | 35 (85.4)                 | 0.209          | 60.2 (76.9)                | 29.9 (73.7)                 | 0.779          |
|                    | Yes    | 21 (26.6)                | 6 (14.6)                  |                | 18.0 (23.1)                | 10.7 (26.3)                 |                |
| Hyperuricemia (%)  | No     | 58 (73.4)                | 36 (87.8)                 | 0.114          | 61.5 (78.7)                | 34.8 (85.7)                 | 0.465          |
|                    | Yes    | 21 (26.6)                | 5 (12.2)                  |                | 16.6 (21.3)                | 5.8 (14.3)                  |                |
| Age (Mean(SD))     |        | 53.10<br>(14.18)         | 41.12<br>(11.16)          | <0.001*        | 49.32<br>(14.38)           | 49.58<br>(14.70)            | 0.955          |
| BMI (Mean (SD))    |        | 24.74<br>(2.59)          | 23.88<br>(1.94)           | 0.065          | 24.55<br>(2.49)            | 24.13<br>(2.50)             | 0.592          |

\* Values are statistically significant

**Table S3 Univariate analysis of stone-related events and future intervention after sIPTW**

| variables                    | Univariate analysis for stone-related events |                | Univariate analysis for future intervention |                |
|------------------------------|----------------------------------------------|----------------|---------------------------------------------|----------------|
|                              | HR (95%CI)                                   | <i>p</i> value | HR (95%CI)                                  | <i>p</i> value |
| <b>Intervention</b>          | 0.203(0.061-0.670)                           | 0.009          | 0.042(0.005-0.326)                          | 0.002          |
| <b>BMI</b>                   | 1.051(0.914-1.210)                           | 0.485          | 1.064(0.843-1.342)                          | 0.603          |
| <b>Age</b>                   | 1.001(0.977-1.026)                           | 0.909          | 0.996(0.964-1.029)                          | 0.820          |
| <b>Sex (male)</b>            | 0.388(0.197-0.766)                           | 0.006          | 0.299(0.107-0.839)                          | 0.022          |
| <b>Profession (pilot)</b>    | 0.455(0.221-0.934)                           | 0.032          | 0.225(0.075-0.669)                          | 0.007          |
| <b>Multiple stones (yes)</b> | 0.692(0.331-1.444)                           | 0.327          | 0.505(0.189-1.350)                          | 0.173          |
| <b>Location (not lower)</b>  | 1.629(0.592-4.483)                           | 0.344          | 4.002(0.856-18.718)                         | 0.078          |
| <b>Stone size (≥5 mm)</b>    | 2.003(0.981-4.090)                           | 0.056          | 2.956(1.058-8.263)                          | 0.039          |
| <b>Prior history (yes)</b>   | 2.072(0.947-4.531)                           | 0.068          | 1.228(0.436-3.458)                          | 0.697          |
| <b>Hyperuricemia (yes)</b>   | 2.379(1.080-5.240)                           | 0.031          | 1.258(0.449-3.527)                          | 0.662          |
